# Supplementary material for: A Mask-Shaped Respiration Sensor Using Triboelectricity and a Machine Learning Approach toward Smart Sleep Monitoring Systems
Source: MDPI journal article supplement (doi:10.3390/polym14173549), 2022-08-29
Supplement: s1 [file s1]

## Supporting Information

# A Mask-Shaped Respiration Sensor Using Triboelectricity and a Machine Learning Approach toward Smart Sleep Monitoring Systems

*Jonghyeon Yun<sup>1,3</sup>, Jihyeon Park<sup>1,3</sup>, Suna Jeong<sup>4</sup>, Deokgi Hong<sup>4,\*</sup>, and Daewon Kim<sup>2,\*</sup>*

<sup>1</sup> Department of Electronics and Information Convergence Engineering, Institute for Wearable Convergence Electronics, Kyung Hee University, 1732 Deogyeong-daero, Giheung-gu, 17104 Yongin, Korea

<sup>2</sup> Department of Electronics and Information Convergence Engineering, Institute for Wearable Convergence Electronics, Kyung Hee University, 1732 Deogyeong-daero, Giheung-gu, 17104 Yongin, Korea

<sup>3</sup> Institute for Wearable Convergence Electronics, Kyung Hee University, 1732 Deogyeong-daero, Gi-heung-gu, 17104 Yongin, Korea

<sup>4</sup> Department of Occupational Therapy, College of Medicine, Wonkwang University, Institution of Envi-roscience, 460 Iksan-daero, Jeollabuk-do, 54538 Iksan, Korea

\* Corresponding author

Email address: hongdgot84@wku.ac.kr (D. G. Hong); daewon@khu.ac.kr (D. Kim)

# **Table of contents**

- 1. The electrical output generated from the M-TENG with various weights of the PTFE film.**
- 2. Actual image of the DSI-24 and electrode locations of the DSI-24.**
- 3. The electrical signal generated from the M-TENG for participant A on the 1<sup>st</sup> day and 2<sup>nd</sup> day.**
- 4. The distribution of the respiration rate and output voltage generated from the M-TENG by the respiration of the participant B with the total of 40 data.**
- 5. The distribution of the respiration rate and output voltage generated from the M-TENG by the respiration of the participant C with the total of 40 data.**
- 6. Comparison of the respiration rate and output voltage generated from the M-TENG by the respiration of participants A, B, and C.**
- 7. Flow chart of the k-mean clustering-based classification model**
- 8. Comparison of the classification accuracy with five different algorithms.**
- 9. Output voltage values according to the sleep stage with participant A.**
- 10. Mean values of voltage and respiration rate and their values of standard deviation for participant A according to sleep stage.**
- 11. Mean values of voltage and respiration rate and their values of standard deviation for participant B according to sleep stage.**
- 12. Mean values of voltage and respiration rate and their values of standard deviation for participant C according to sleep stage.**

1. The electrical output generated from the M-TENG with various weights of the PTFE film.

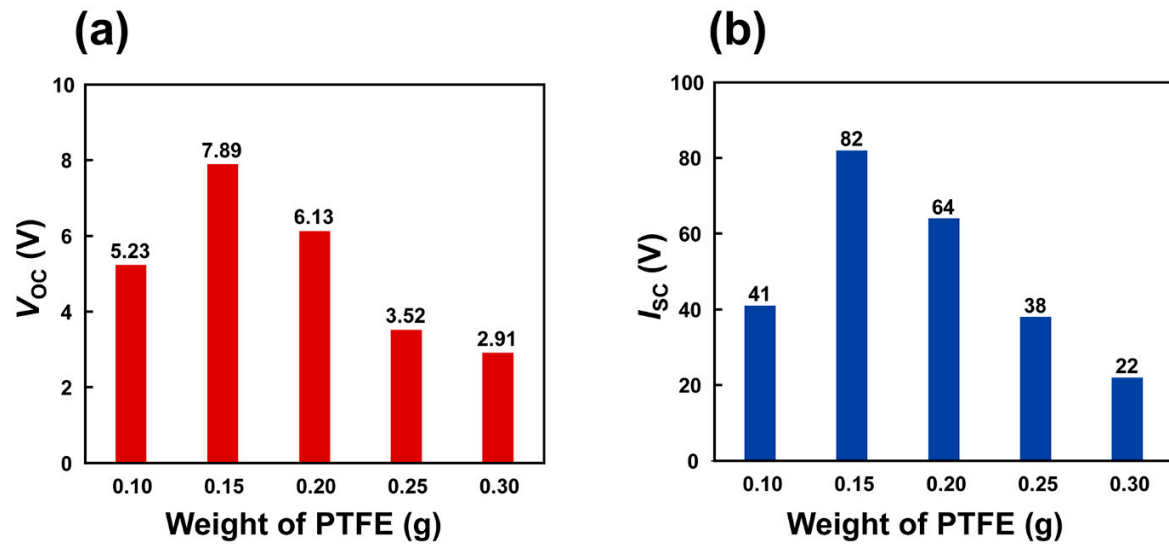

**Figure S1.** The electrical output generated from the M-TENG with various weights of the PTFE film. (a) The open-circuit voltage with various weights of the PTFE. (b) The short-circuit current with various weights of the PTFE.

## 2. Actual image of the DSI-24 and electrode locations of the DSI-24.

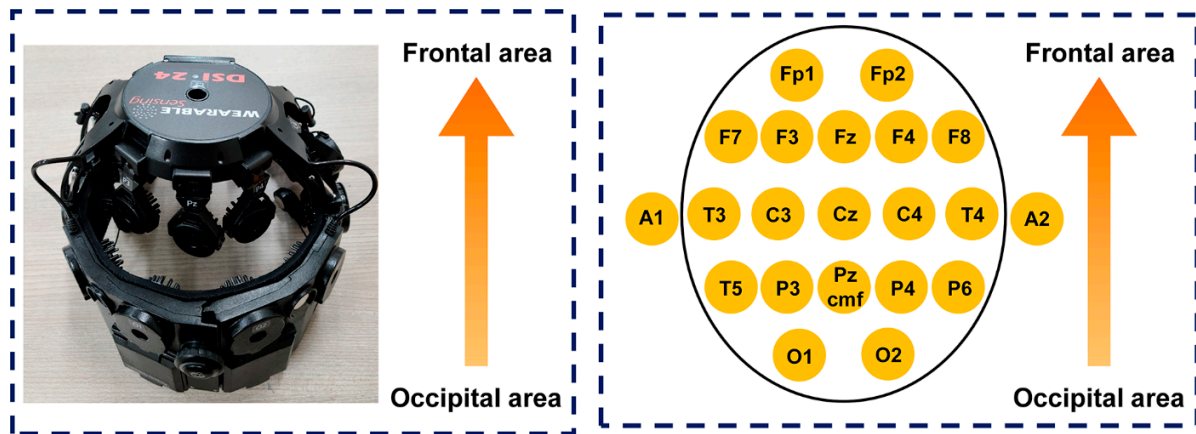

**Figure S2.** Actual image of the DSI-24 and its electrode locations.

3. The electrical signal generated from the M-TENG for participant A on the 1<sup>st</sup> day and 2<sup>nd</sup> day.

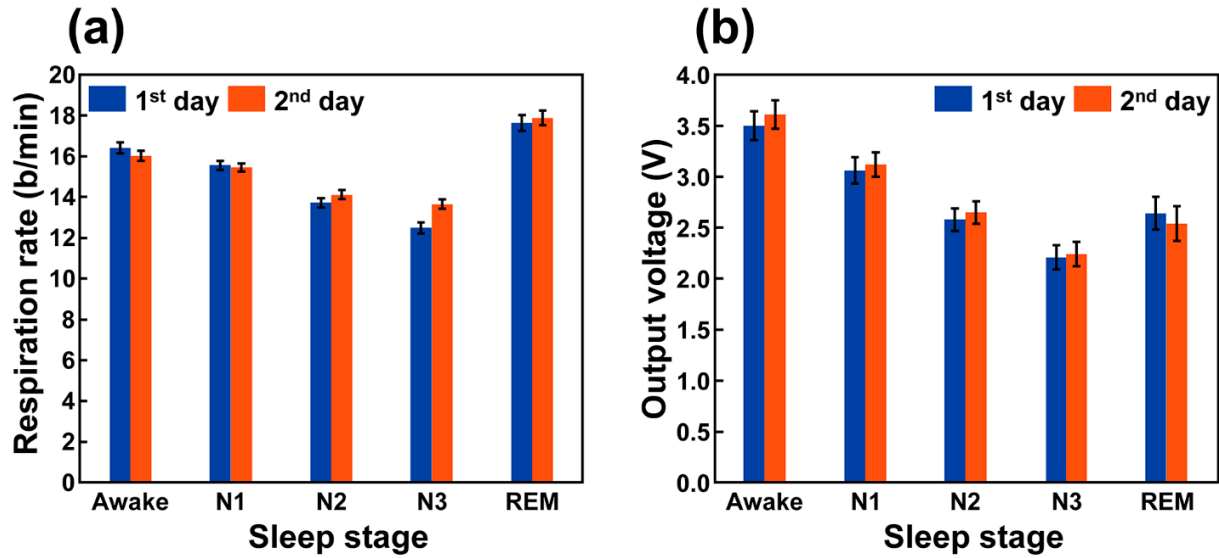

**Figure S3.** The electrical signal generated from the M-TENG for participant A on the 1<sup>st</sup> day and 2<sup>nd</sup> day, respectively. (a) The respiration rates of participant A in 1<sup>st</sup> day and 2<sup>nd</sup>. (b) The output voltage of participant A on the 1<sup>st</sup> day and 2<sup>nd</sup>.

4. The distribution of the respiration rate and output voltage generated from the M-TENG by the respiration of the participant B with the total of 40 data.

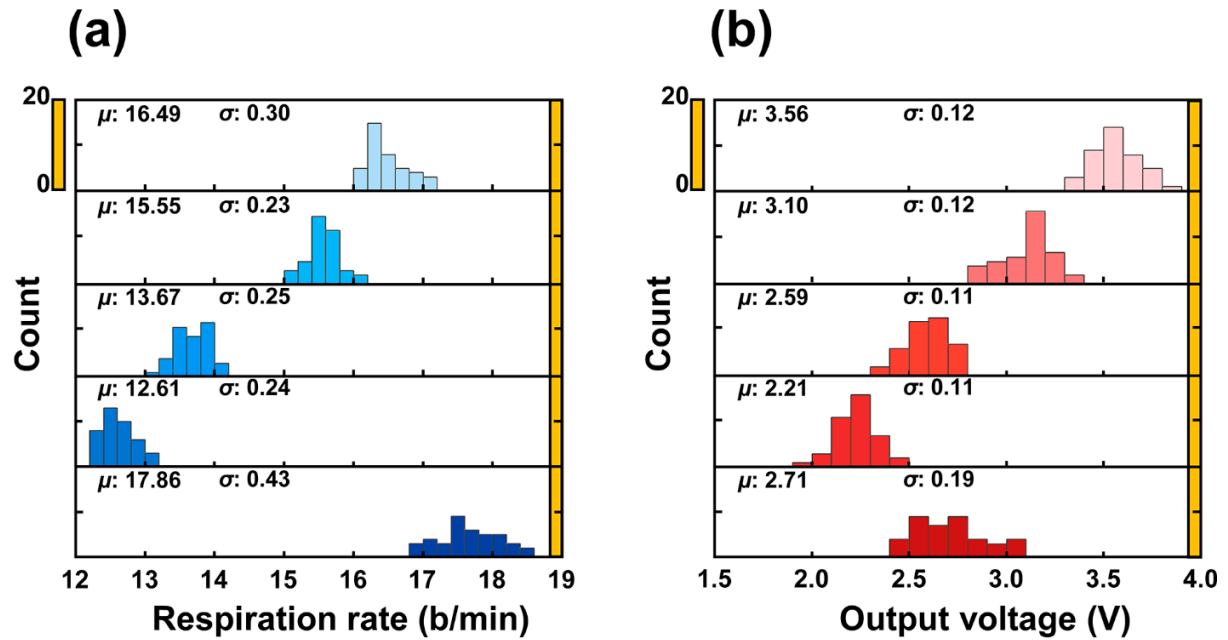

**Figure S4.** The distribution of the respiration rate and output voltage generated from the M-TENG by the respiration of the participant B with the total of 40 data. (a) The distribution of the respiration rates conducted by participant B. (b) The distribution of the output voltage generated from the M-TENG by the respiration of the participant B.

5. The distribution of the respiration rate and output voltage generated from the M-TENG by the respiration of the participant C with the total of 40 data.

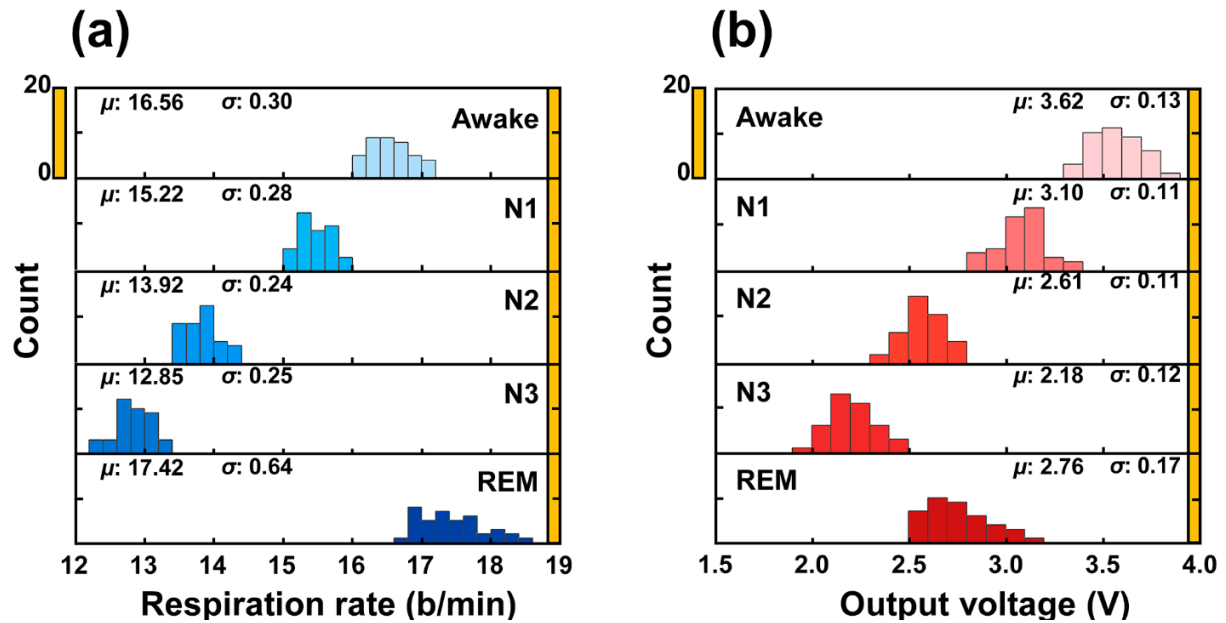

**Figure S5.** The distribution of the respiration rate and output voltage generated from the M-TENG by the respiration of the participant C with the total of 40 data. (a) The distribution of the respiration rates conducted by participant C. (b) The distribution of the output voltage generated from the M-TENG by the respiration of the participant B.

6. Comparison of the respiration rate and output voltage generated from the M-TENG by the respiration of participants A, B, and C.

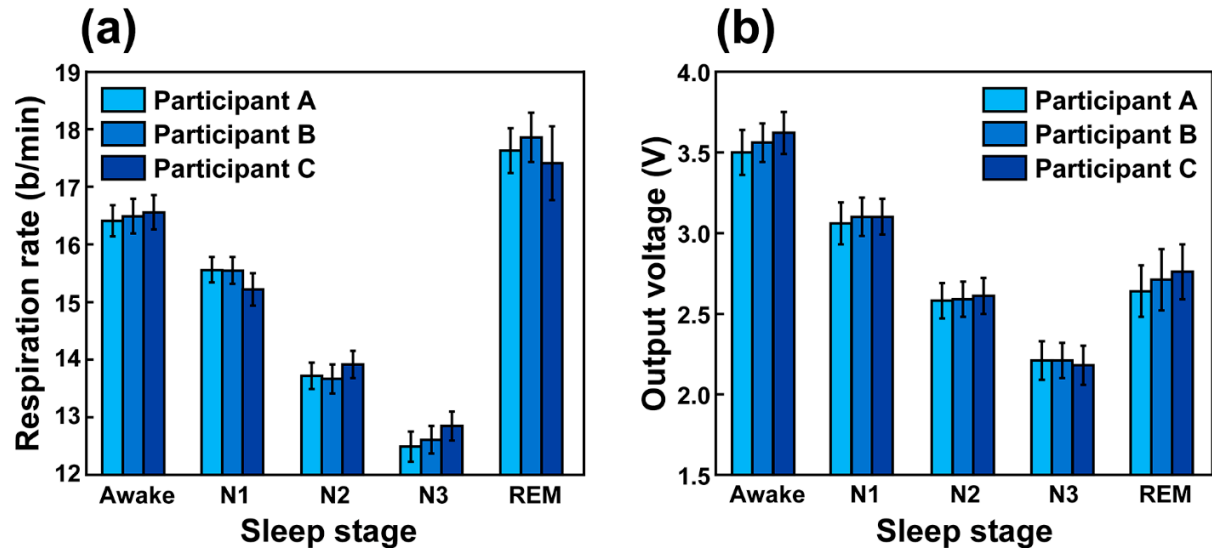

**Figure S6.** Comparison of the respiration rate and output voltage generated from the M-TENG by the respiration of the participants. (a) The comparison of the respiration rates of participants A, B, and C. (b) The comparison of the output voltage generated from the M-TENG by the respiration of participants A, B, and C.



**7. Flow chart of the k-mean clustering-based classification model.**

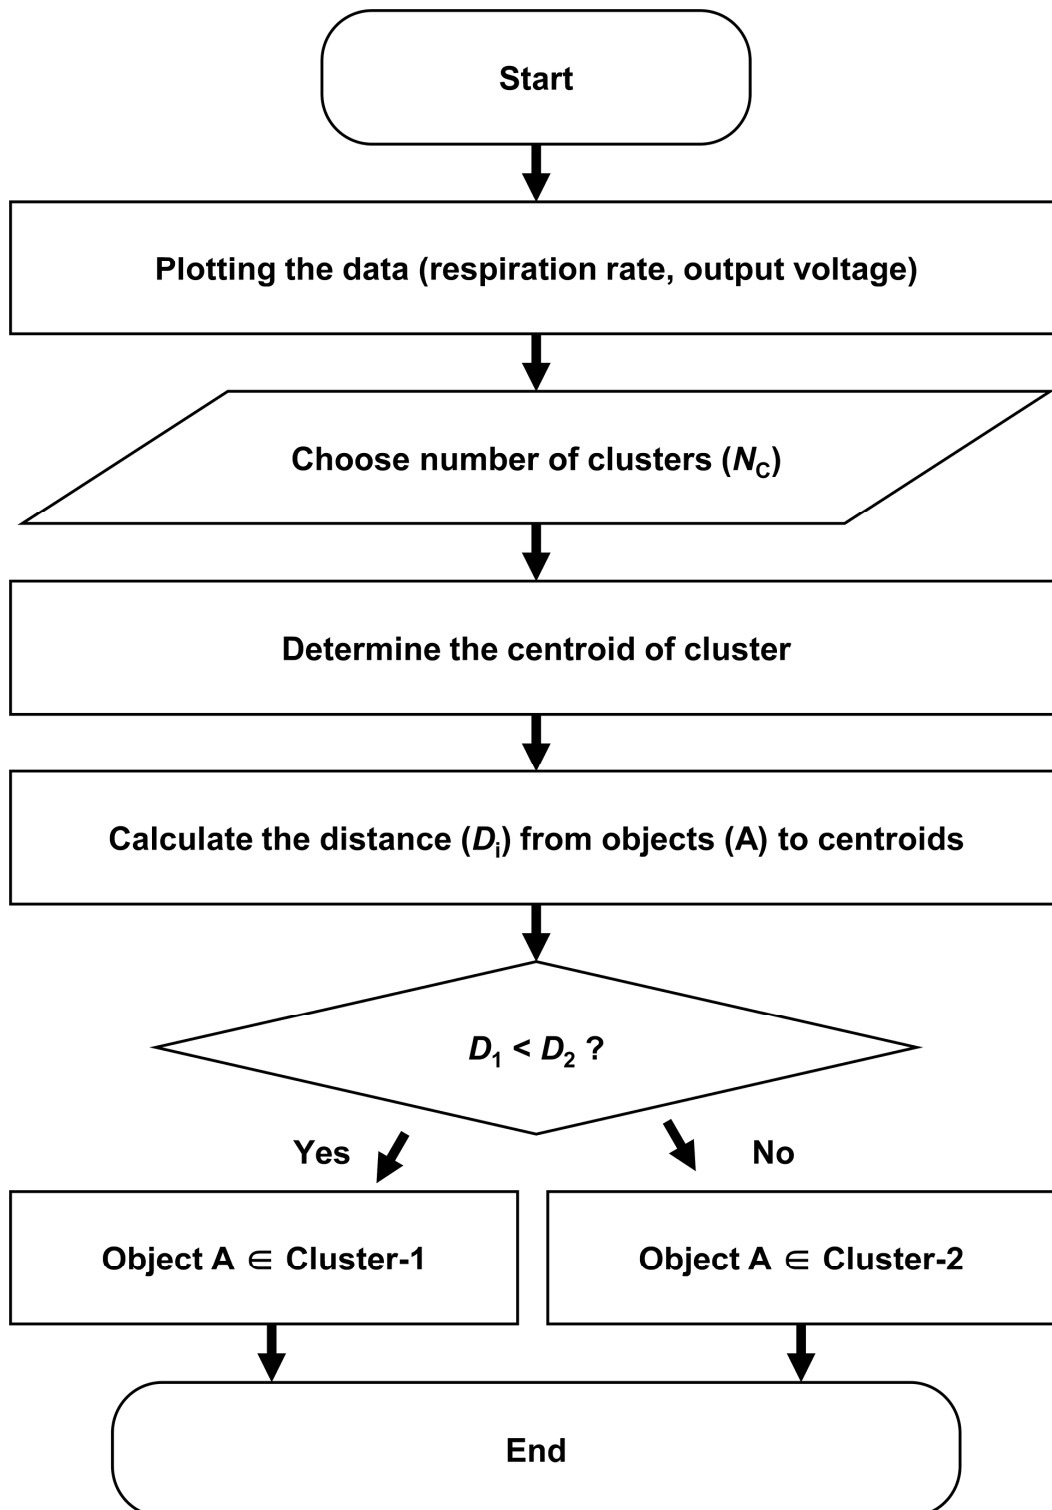

**Figure S7.** Entire flow chart of the k-mean clustering-based classification model.

8. Comparison of the classification accuracy with five different algorithms.

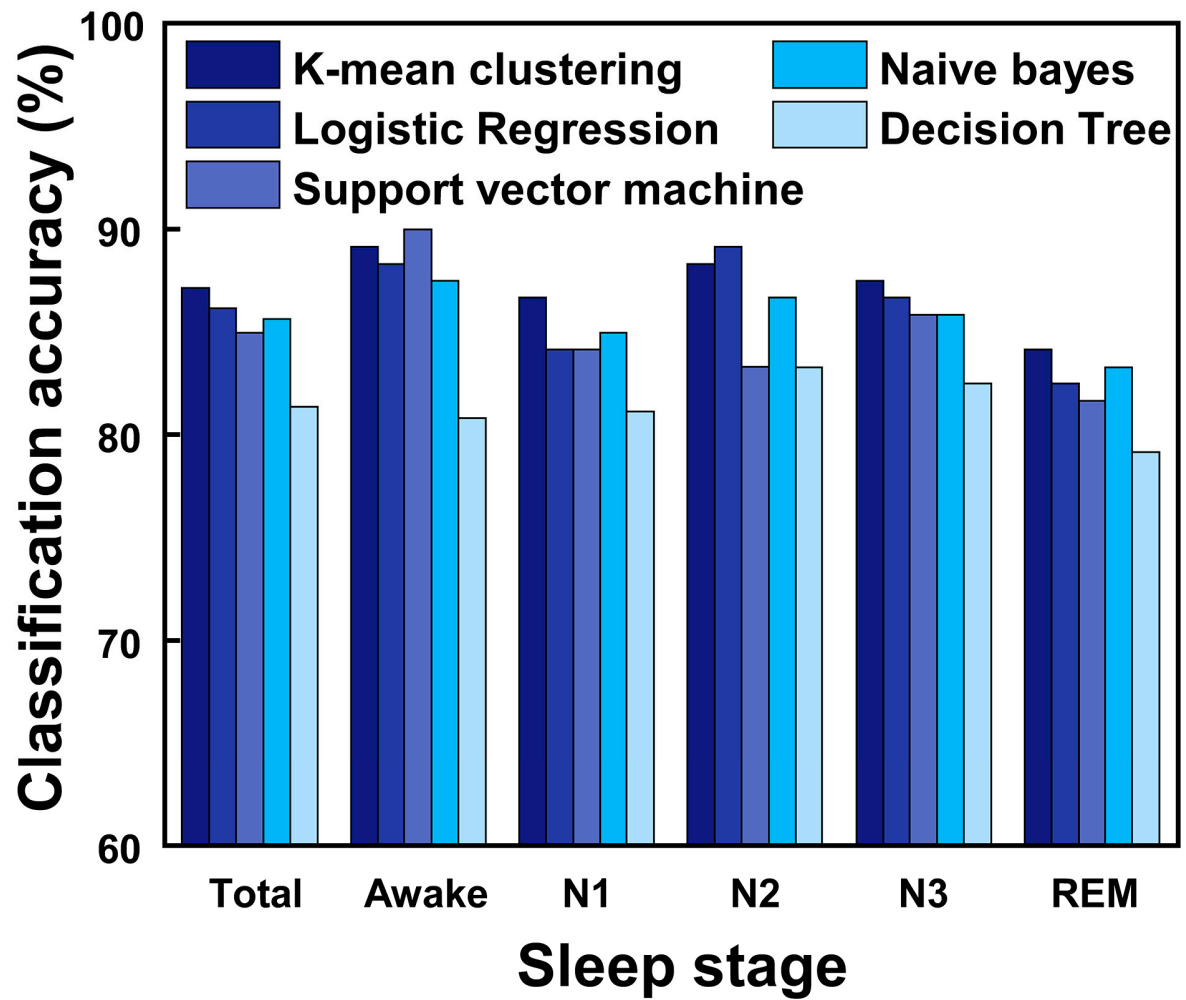

Figure S8. Comparison of the classification accuracy with five different algorithms.

### 9. Output voltage values according to the sleep stage with participant A

| Sleep stage                   | Awake | N1    | N2    | N3    | REM   |
|-------------------------------|-------|-------|-------|-------|-------|
| Mean value of the voltage (V) | 3.562 | 3.084 | 2.655 | 2.312 | 2.612 |

**Table S1.** Measured output voltage according to the sleep stage with participant A

### 10. Mean values of voltage and respiration rate and their values of standard deviation for participant A according to sleep stage.

| Sleep stage                            | Awake | N1    | N2    | N3    | REM   |
|----------------------------------------|-------|-------|-------|-------|-------|
| Mean value of the voltage (V)          | 3.50  | 3.06  | 2.58  | 2.21  | 2.64  |
| standard deviation of voltage          | 0.14  | 0.13  | 0.11  | 0.12  | 0.16  |
| Mean value of respiration rate (b/min) | 16.41 | 15.56 | 13.72 | 12.49 | 17.63 |
| standard deviation of respiration rate | 0.27  | 0.22  | 0.23  | 0.26  | 0.39  |

**Table S2.** Mean values of electrical output and respiration rate and their values of standard deviation for participant B according to sleep stage.

### 11. Mean values of voltage and respiration rate and their values of standard deviation for participant B according to sleep stage.

| Sleep stage                            | Awake | N1    | N2    | N3    | REM   |
|----------------------------------------|-------|-------|-------|-------|-------|
| Mean value of the voltage (V)          | 3.56  | 3.10  | 2.59  | 2.21  | 2.71  |
| standard deviation of voltage          | 0.30  | 0.23  | 0.25  | 0.24  | 0.43  |
| Mean value of respiration rate (b/min) | 16.49 | 15.55 | 13.67 | 12.61 | 17.86 |
| standard deviation of respiration rate | 0.12  | 0.12  | 0.11  | 0.11  | 0.19  |

**Table S3.** Mean values of electrical output and respiration rate and their values of standard deviation for participant B according to sleep stage.

**12. Mean values of voltage and respiration rate and their values of standard deviation for participant C according to sleep stage.**

| <b>Sleep stage</b>                            | <b>Awake</b> | <b>N1</b>    | <b>N2</b>    | <b>N3</b>    | <b>REM</b>   |
|-----------------------------------------------|--------------|--------------|--------------|--------------|--------------|
| <b>Mean value of the voltage</b>              | <b>3.62</b>  | <b>3.10</b>  | <b>2.61</b>  | <b>2.18</b>  | <b>2.76</b>  |
| <b>standard deviation of voltage</b>          | <b>0.30</b>  | <b>0.28</b>  | <b>0.24</b>  | <b>0.25</b>  | <b>0.64</b>  |
| <b>Mean value of respiration rate</b>         | <b>16.56</b> | <b>15.22</b> | <b>13.92</b> | <b>12.85</b> | <b>17.42</b> |
| <b>standard deviation of respiration rate</b> | <b>0.13</b>  | <b>0.11</b>  | <b>0.11</b>  | <b>0.12</b>  | <b>0.17</b>  |

**Table S4.** Mean values of electrical output and respiration rate and their values of standard deviation for participant C according to sleep stage.
